# Supplementary material for: Enhanced excitability of cortical neurons in low-divalent solutions is primarily mediated by altered voltage-dependence of voltage-gated sodium channels
Source: eLife. 2021 May 11;10:e67914. doi: 10.7554/eLife.67914 (PMC8163501; doi:10.7554/eLife.67914)
Supplement: Figure 1—source data 1. — RMP units are mV and each sub-column represents measurements from a single neuron. [file elife-67914-fig1-data1.xlsx]

## Sheet: AP frequency
Action potential frequency in conventional WT, NesCre and Casr-/- neurons in T1.1 or T0.2 with no current injection. Columns show contain repeated measures.		con WT																					cre WT																					CasR-/-
	T1.1	0.0266667	0	0.193333	0.813333	0	0	0	0	0.00666667	0.113333	0.0133333	0.00666667	0.0933333	0	0.0133333	0.0466667	0.16	0.02				0.00666667	0.206667	0	0.0266667	0.0333333	0	0.0266667	0	0	0	0	0.213333	0.02	0	0	0.0866667	0	0	0	0	0.126667	0	0	0	0.00666667	0	0
	T0.2	1.67333	8.62667	6.9	0	0	14.7467	2.3037	14.6933	2.37333	7.95333	0.186667	7.60667	3.7	0.0333333	2.92667	11.8067	8.80667	12.1867				0.133333	16.7533	16.6133	16.0733	1.11333	24.6067	6.90667	0	26.84	0.22	0.00666667	0.646667	6.92667	0.00719425	6.84	0.306667	0.0133333	0.08	0	9.02	1.14667	0.0933333	0.0333333	0	8.93333	5.22	0.0933333
[truncated: 12 more columns]

## Sheet: RMP
Resting membrane potential in conventional WT, NesCre and Casr-/- neurons in T1.1 or T0.2 with no current injection. Columns show contain repeated measures.		con WT																					cre WT																					CasR-/-
	T1.1	-70.9	-79.6	-58.02	-75.73	-77.04	-54.81	-76.99	-69.7	-75.74	-64.24	-59.74	-75.75	-66.39	-79.15	-64.5	-70.15	-67.78	-66.21				-77.01	-62.67	-65.75	-59.54	-67.44	-67.15	-58.15	-72.94	-59.42	-70.46	-67.73	-67.01	-63.14	-70.42	-62.63	-66.98	-72	-72.35	-70.28	-67.67	-52.32	-76.9	-69.65	-70.26	-66.75	-72.82	-74.1
	T0.2	-63.34	-63.18	-56.23	-72.29	-75.22	-53.31	-73.67	-64.37	-59.22	-55.65	-54.36	-67	-49.67	-80.23	-41.8	-62.27	-64.34	-52.35				-60.59	-51.79	-61.05	-49.14	-50.53	-58.79	-55.87	-72.88	-47.58	-70.17	-66.16	-65.6	-59.41	-65.2	-53.6	-61.21	-72.57	-69.59	-67.99	-62.21	-53.13	-62.51	-65.57	-72.59	-60.68	-58.25	-73
[truncated: 12 more columns]
