# Supplementary material for: Enhanced excitability of cortical neurons in low-divalent solutions is primarily mediated by altered voltage-dependence of voltage-gated sodium channels
Source: eLife. 2021 May 11;10:e67914. doi: 10.7554/eLife.67914 (PMC8163501; doi:10.7554/eLife.67914)
Supplement: Figure 2—source data 1. — The action potential frequency is in log base 10 and each sub-column represents measurements from a single neuron. [file elife-67914-fig2-data1.xlsx]

## Sheet: Log AP freq (-70 mV)
		NesCre (creWT)																Casr-/-
Log transfer of action potential frequency in NesCre and Casr-/- neurons in T1.1 or T0.2 with standing currents Ia and Ib. Columns show contain repeated measures.	Ca 1.1 Ia	-1.69897	-1.69897	-1.22185	-1.69897	-1.69897	-1.69897	-1.39794	-1.39794	-1.69897	-1.69897	-1.69897	-1.39794	-1.69897	-1.69897	-1.69897		-1.69897	-1.39794	-1.22185	-1.69897	-1.69897	-1.69897	-1.39794	-1.69897	-1.22185	-1.39794	-1.69897	-1.69897	-1.69897	-1.69897	-0.853872	-1.69897
	Ca 0.2 Ia	0.883093	0.257679	-1.69897	-1.69897	-1.69897	-1.04576	-1.69897	1.28937	1.04883	0.0211893	-1.69897	1.15198	0.622214	-1.69897	-1.69897		0.650308	0.562293	-1.30103	-0.267606	-1.69897	-1.30103	-0.920819	-0.0555173	-0.79588	0.326336	0.588832	-1.04576	-1.30103	0.815578	-1.04576	-1.30103
	Ca 0.2 Ib	-0.0861862	-0.657577	0.217484	-0.585027	-1.39794	-1.69897	-1.69897	-0.508638	-1.69897	-1.22185	-1.39794	0.274158	0.184691	-1.69897	-1.69897		-1.69897	0.283301	-1.69897	-0.366532	-1.69897	-1.69897	-0.455932	-0.0757207	-1.69897	-0.387216	-1.69897	-0.148742	-1.09691	-0.744727	-1.39794	-1.09691
	Ca 1.1 Ib	-1.24384	-1.69897	-0.801533	-1.69897	-1.26374	-1.69897	-1.69897	-1.69897	-1.69897	-1.69897	-1.69897	-1.69897	-1.69897	-1.69897	-1.69897		-1.69897	-1.69897	-1.04576	-1.69897	-1.69897	-1.69897	-1.04576	-0.638272	-1.30103	-1.04576	-0.267606	-1.69897	-1.30103	-1.69897	-1.04576	-1.69897
