# Supplementary material for: Enhanced excitability of cortical neurons in low-divalent solutions is primarily mediated by altered voltage-dependence of voltage-gated sodium channels
Source: eLife. 2021 May 11;10:e67914. doi: 10.7554/eLife.67914 (PMC8163501; doi:10.7554/eLife.67914)
Supplement: Figure 6—source data 1. — Depolarization units are volts and each sub-column represents measurements from a single neuron. [file elife-67914-fig6-data1.xlsx]

## Sheet: Sheet1
Calcium dependent voltage change sensitive to TTX, Gd or resistant to both in conWT and Casr-/- neurons. Columns show contain repeated measures.		conWT													Casr-/-
	TTX sens Cadep Voltage change	0.00315	0.00665	0.017	0.00401	5.15e-05	0.00192	0.00594	0.00563	0.00352	0.0126	0.00694	0.0173		0.00841447	-0.0004916	0.00139512	0.0034304	-0.0002101	0.00793796	0.0056855	0.011431	0.0112231
	Gd sens Cadep Voltage change	0.0001136	-1.02e-05	0.0010839	0.0012558	0.0047844	0.001218	0.0024004	0.0014228	-0.0014827	-0.0020256	0.0007838	-0.00317		0.0036424	0.0036886	0.0001204	-0.0004842	-0.0018691	-0.0008334	0.0009385	0.0066202	0.0004662
	Rem Cadep Voltage change	-0.0025698	-0.0005343	-0.0010102	-0.0037594	0.0017993	-0.0011893	0.000898	-0.0003285	0.0002037	0.0037883	-0.0002036	-0.00152		0.0019003	-0.0011531	-0.0001294	-0.0006364	0.0021742	0.0011597	0.0005545	0.0038898	-0.0010189
